# Supplementary material
Source: HighWire-hosted journal article supplement (https://bmjpaedsopen.bmj.com/content/4/1/e000913)
Supplement: inline-supplementary-material-2 [file inline-supplementary-material-2.pdf]

**Additional file: Draft of the search strategy utilized in each selected database.**

| <b>Search Strategy</b> |                                                                                                                                                                                                                                                                                                                                                                                                                                                                                                               |
|------------------------|---------------------------------------------------------------------------------------------------------------------------------------------------------------------------------------------------------------------------------------------------------------------------------------------------------------------------------------------------------------------------------------------------------------------------------------------------------------------------------------------------------------|
| <b>Population</b>      | child <i>OR</i> adolescent <i>OR</i> teen <i>OR</i> student <i>OR</i> boy <i>OR</i> girl <i>OR</i> kid <i>OR</i> pediatric                                                                                                                                                                                                                                                                                                                                                                                    |
| <i>AND</i>             |                                                                                                                                                                                                                                                                                                                                                                                                                                                                                                               |
| <b>Interest</b>        | floods <i>OR</i> hurricanes <i>OR</i> tornadoes <i>OR</i> volcanoes <i>OR</i> earthquakes <i>OR</i> tsunamis <i>OR</i> storms <i>OR</i> hazards <i>OR</i> risks <i>OR</i> fire <i>OR</i> bushfire <i>OR</i> landslide <i>OR</i> sandstorm <i>OR</i> drought <i>OR</i> snowstorm <i>OR</i> avalanche <i>OR</i> thunderstorms <i>OR</i> COVID-19 <i>OR</i> Influenza <i>OR</i> Zika <i>OR</i> malaria <i>OR</i> Ebola <i>OR</i> epidemic <i>OR</i> famine <i>OR</i> mass shooting <i>OR</i> industrial accident |
|                        | <i>AND</i>                                                                                                                                                                                                                                                                                                                                                                                                                                                                                                    |
|                        | preparedness <i>OR</i> education <i>OR</i> readiness <i>OR</i> drill                                                                                                                                                                                                                                                                                                                                                                                                                                          |
| <i>AND</i>             |                                                                                                                                                                                                                                                                                                                                                                                                                                                                                                               |
| <b>Context</b>         | school <i>OR</i> class                                                                                                                                                                                                                                                                                                                                                                                                                                                                                        |

### Search Strategy – PubMed (May 5, 2019)

Search:

#1 (((child[Title/Abstract] OR adolescent[Title/Abstract] OR teen[Title/Abstract] OR student[Title/Abstract] OR boy[Title/Abstract] OR girl[Title/Abstract] OR kid[Title/Abstract] OR pediatric[Title/Abstract]))

AND

#2 (floods[Title/Abstract] OR hurricanes[Title/Abstract] OR tornadoes[Title/Abstract] OR volcanoes[Title/Abstract] OR earthquakes[Title/Abstract] OR tsunamis[Title/Abstract] OR storms[Title/Abstract] OR hazards[Title/Abstract] OR risks[Title/Abstract] OR fire[Title/Abstract] OR bushfire[Title/Abstract] OR landslide[Title/Abstract] OR sandstorm[Title/Abstract] OR drought[Title/Abstract] OR snowstorm[Title/Abstract] OR avalanche[Title/Abstract] OR thunderstorms[Title/Abstract] OR COVID-19[Title/Abstract] OR Influenza[Title/Abstract] OR Zika[Title/Abstract] OR malaria[Title/Abstract] OR Ebola[Title/Abstract] OR epidemic[Title/Abstract] OR conflicts[Title/Abstract] OR famine[Title/Abstract] OR mass shooting OR [Title/Abstract] OR industrial accidents [Title/Abstract]))

AND

#3 (preparedness[Title/Abstract] OR education[Title/Abstract] OR readiness[Title/Abstract] OR drill[Title/Abstract]))

AND

#4 (school[Title/Abstract] OR class[Title/Abstract]) (((((((("child"[Title/Abstract] OR "adolescent"[Title/Abstract]) OR "teen"[Title/Abstract]) OR "student"[Title/Abstract]) OR "boy"[Title/Abstract]) OR "girl"[Title/Abstract]) OR "kid"[Title/Abstract]) OR "pediatric"[Title/Abstract]))
